# Supplementary material for: The clinical value, regulatory mechanisms, and gene network of the cancer-testis gene STK31 in pancreatic cancer
Source: PubMed Central journal article supplement (PMC5471042; doi:10.18632/oncotarget.16814), 2017-04-04
Supplement: oncotarget-08-35154-s001.pdf [file oncotarget-08-35154-s001.pdf]

## **The clinical value, regulatory mechanisms, and gene network of the cancer-testis gene *STK31* in pancreatic cancer**

### **SUPPLEMENTARY TABLE**

**Supplementary Table 1: Go analysis for these related genes of STK31.**

**See Supplementary File 1**
